# Supplementary material for: MYCN protein stability is a better prognostic indicator in neuroblastoma
Source: Springer Nature journal article supplement (doi:10.1186/s12887-022-03449-1), 2022-07-11

# Supplemental Figure 1

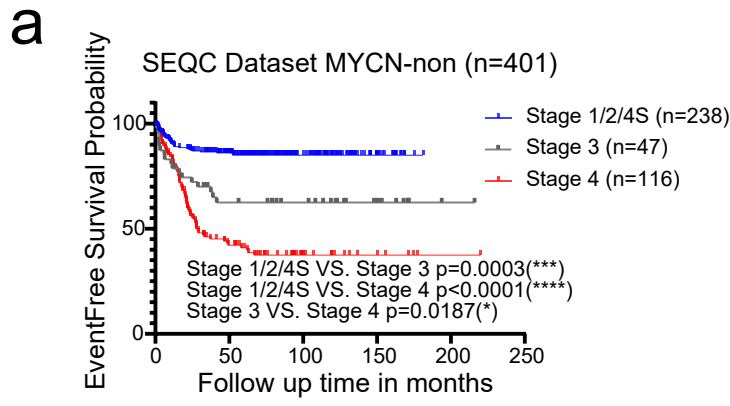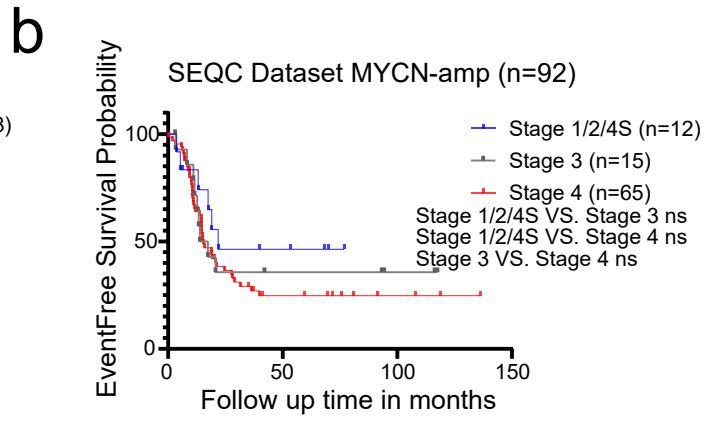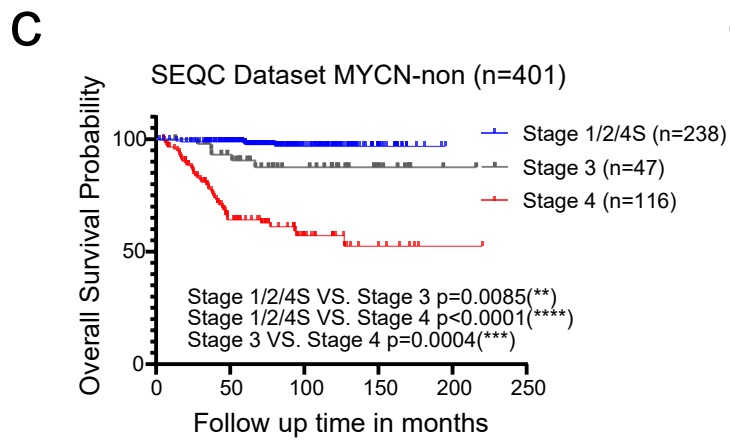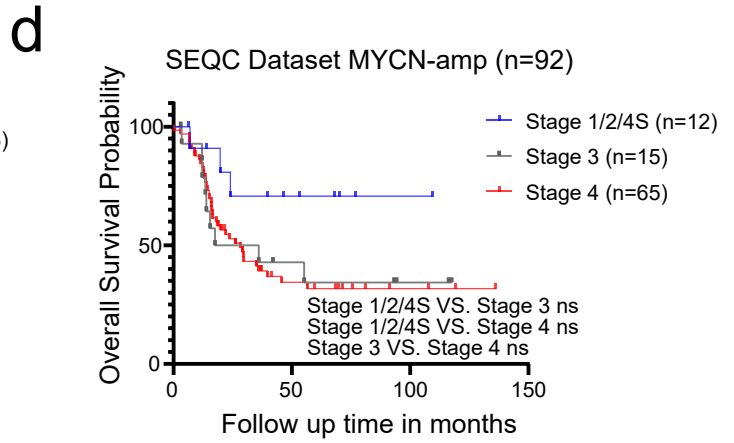

Supplement: MOESM1 [file 23258868]
